# Supplementary material for: Photodegradable polyacrylamide tanglemers enable spatiotemporal control over chain lengthening in high-strength and low-hysteresis hydrogels
Source: PubMed Central journal article supplement — J Mater Chem B. 2024 Dec 6;13(3):894–903. doi: 10.1039/d4tb02149e (PMC11626382; doi:10.1039/d4tb02149e), 2024-12-06
Supplement: TB-OLF-D4TB02149E-s001.pdf [file TB-OLF-D4TB02149E-s001.pdf]

Supporting Information for

## **Photodegradable polyacrylamide tanglemers enable spatiotemporal control over chain lengthening in high-strength and low-hysteresis hydrogels**

Joshua S. Lee<sup>1,\*</sup>, Bruce E. Kirkpatrick<sup>1,2,3,\*</sup>, Abhishek P. Dhand<sup>4</sup>, Lea Pearl Hibbard<sup>1</sup>, Benjamin R. Nelson<sup>1,2</sup>, Nathaniel P. Skillin<sup>1,2,3</sup>, Makayla C. Johnson<sup>1</sup>, Dilara Batan<sup>2,5</sup>, Benjamin D. Fairbanks<sup>1</sup>, Timothy J. White<sup>1,6</sup>, Christopher N. Bowman<sup>1,6</sup>, Jason A. Burdick<sup>1,2,6</sup>, Kristi S. Anseth<sup>1,2,6,#</sup>

\*equal contribution

#corresponding author, [kristi.anseth@colorado.edu](mailto:kristi.anseth@colorado.edu)

<sup>1</sup>Department of Chemical and Biological Engineering, University of Colorado Boulder

<sup>2</sup>BioFrontiers Institute, University of Colorado Boulder

<sup>3</sup>Medical Scientist Training Program, University of Colorado Anschutz Medical Campus

<sup>4</sup>Department of Bioengineering, University of Pennsylvania

<sup>5</sup>Department of Biochemistry, University of Colorado Boulder

<sup>6</sup>Materials Science and Engineering Program, University of Colorado Boulder

### **Contents**

Supplementary Figures S1-10

Captions for Movies S1-3

## Supplementary Figures

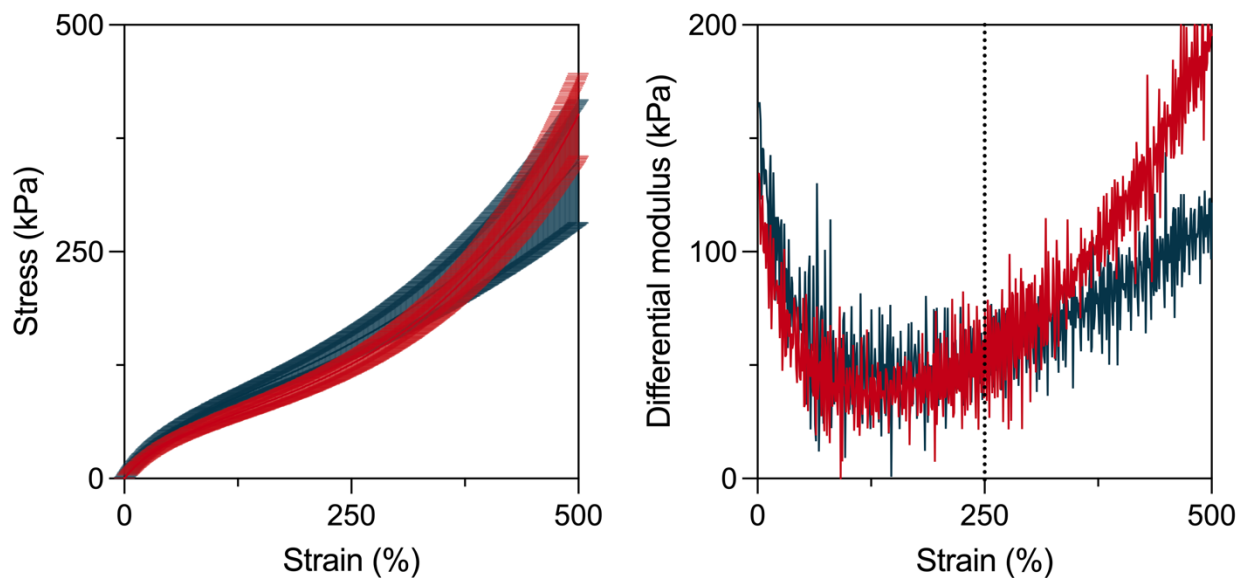

**Fig. S1** | The first derivative of the stress-strain curve (differential modulus) illustrates strain-stiffening behavior that occurs after 250% strain, marking the limit of extensibility after which physical entanglements begin to accumulate at covalent crosslinkers.

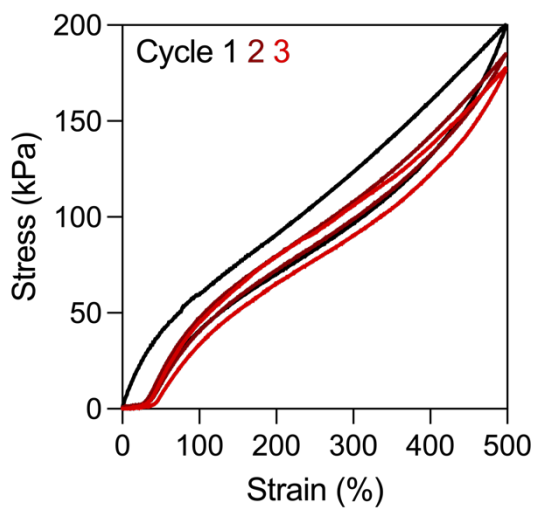

**Fig. S2** | Cyclic loading to 500% strain and unloading of diPDA-crosslinked tanglemer identifies increased hysteresis (10-20%) compared to lower strains.

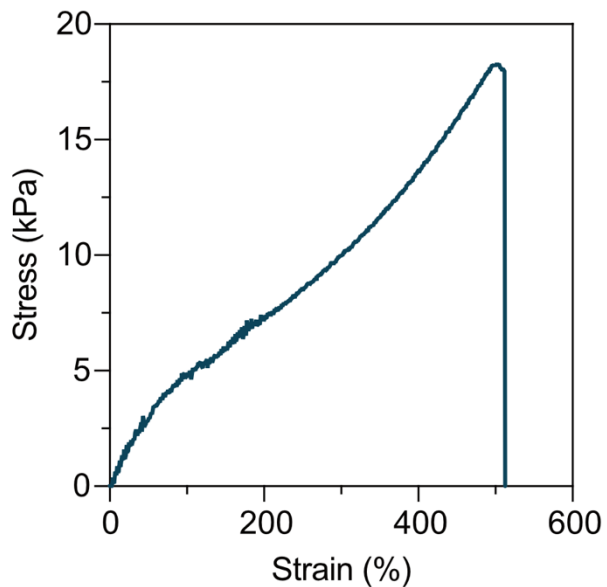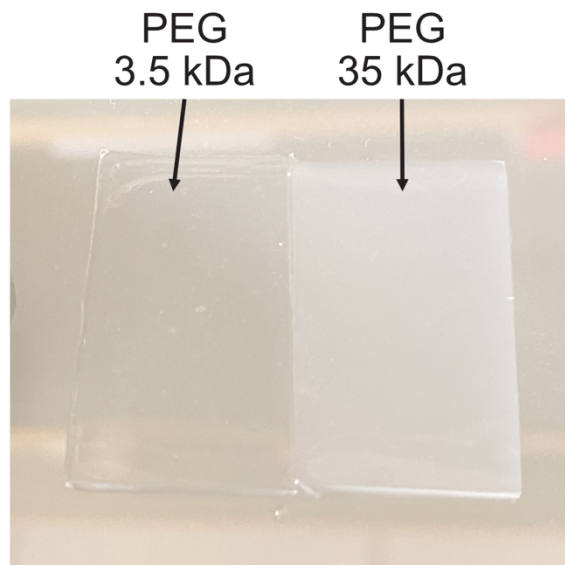

**Fig. S3** | Tanglemers prepared from PEG 35 kDa diacrylate are soft, have low fracture strength, and show visible phase separation (indicated by gel opacity).

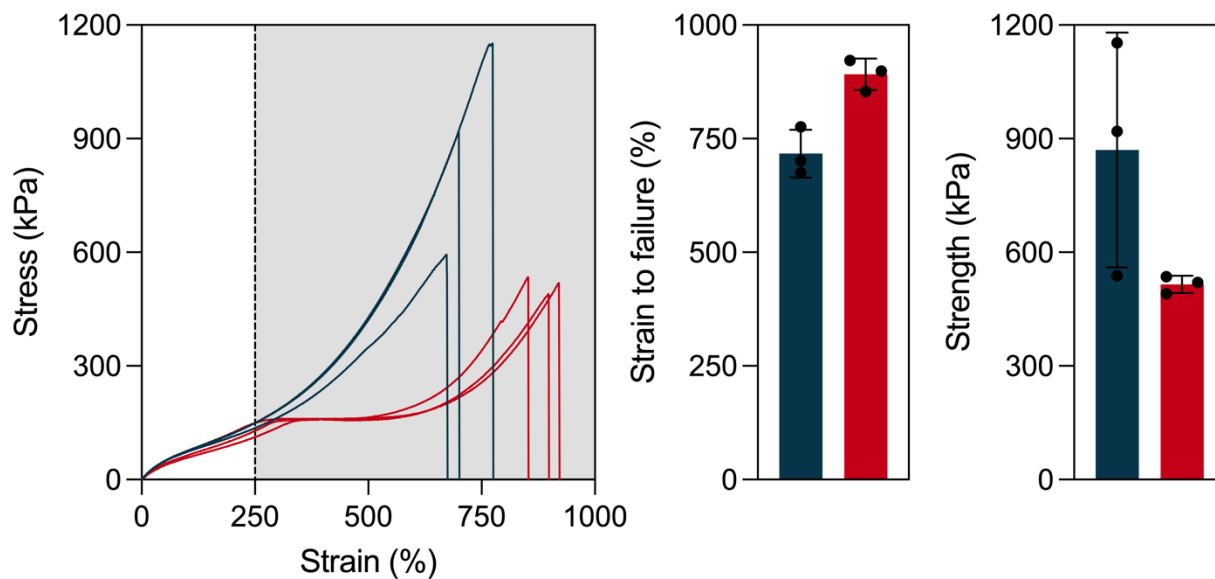

**Fig. S4** | *In situ* photodegradation of tanglemers under strain increases extensibility but reduces fracture strength.

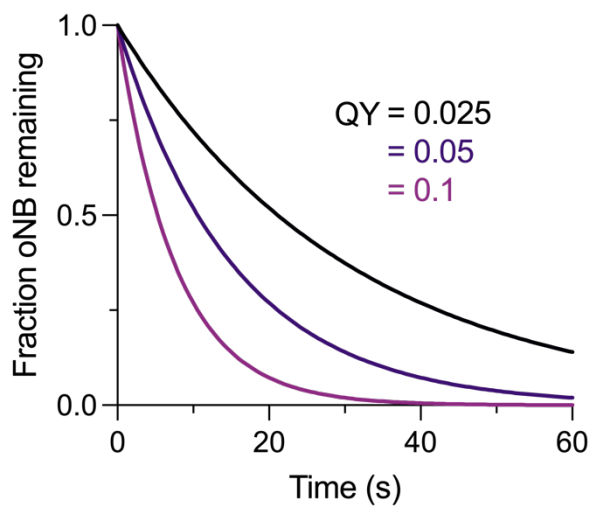

**Fig. S5** | Calculated oNB degradation with varied quantum yield (QY), assuming first-order kinetics, a molar extinction coefficient of  $4300 \text{ M}^{-1} \text{ cm}^{-1}$  at 365 nm, PEG-diPDA concentration of 0.0125 wt%, and an intensity of  $100 \text{ mW/cm}^2$ .

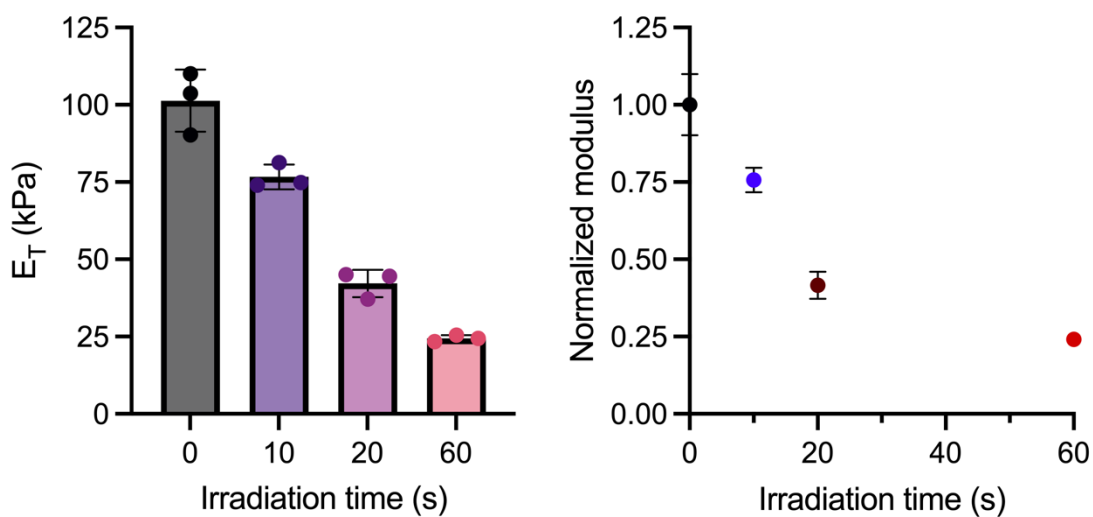

**Fig. S6** | Raw data of oNB tanglemer photodegradation (left) and modulus normalized to 0s of irradiation (right).

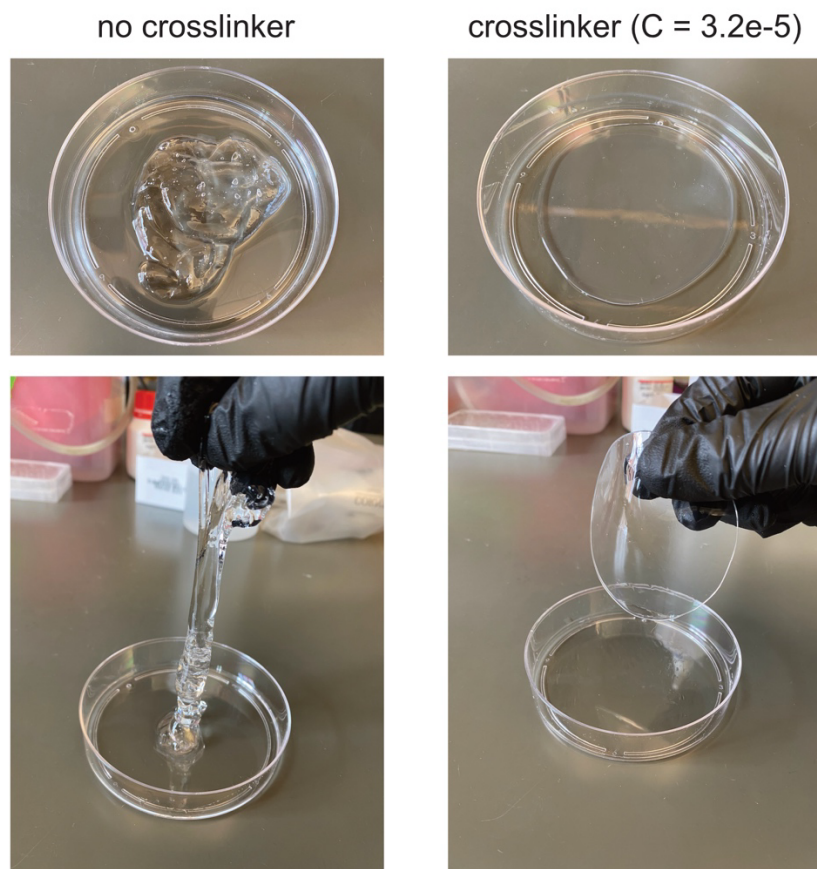

**Fig. S7** | Images of tanglemers prepared with and without crosslinker, showing dramatic swelling in samples without entanglement-stabilizing covalent crosslinks.

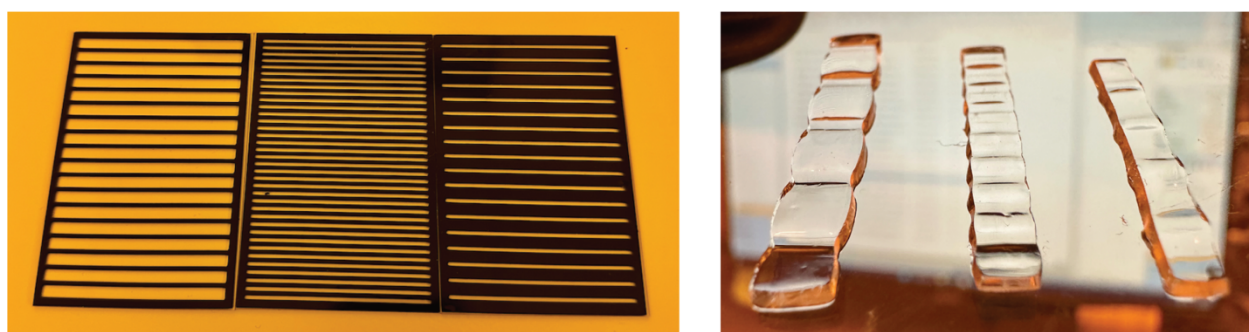

**Fig. S8** | Vinyl photomasks affixed to glass slides (left) and tanglemers patterned using these masks and equilibrated following light exposure (right), showing varied swelling depending on spatial exposure.

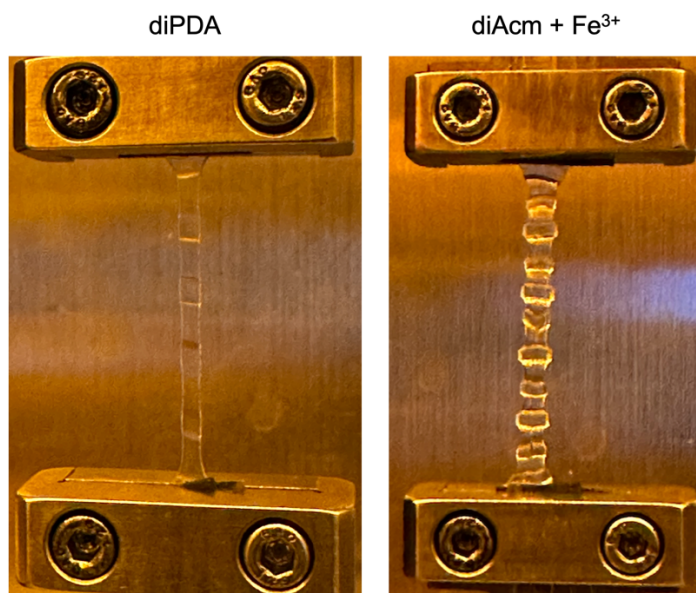

**Fig. S9** | Macro image of tanglemers spatially patterned by either oNB cleavage or  $\text{Fe}^{3+}$  oxidation.

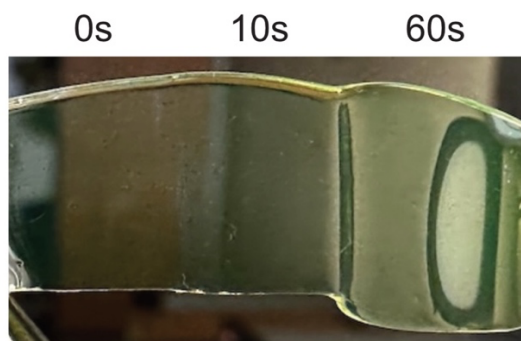

**Fig. S10** | Macro image of tangler exposed to 365 nm light at  $100 \text{ mW/cm}^2$  for varied times (used for FRAP characterization), showing varied swelling depending on temporal exposure.

### **Movie Captions**

**Movie S1.** | Reduced strain-induced birefringence is observed in diPDA-crosslinked tanglemers following photodegradation.

**Movie S2.** | Through-thickness photo-oxidation of diAcm-crosslinked tanglemers results in complete degradation of the network.

**Movie S3.** | Reverse gelation of pre-irradiated diPDA-crosslinked tanglemers via photo-oxidation.
